# Supplementary material
Source: PubMed Central journal article supplement (PMC1899914)
Supplement: molcellb_27_8_2830__1.pdf [file molcellb_27_8_2830__1.pdf]

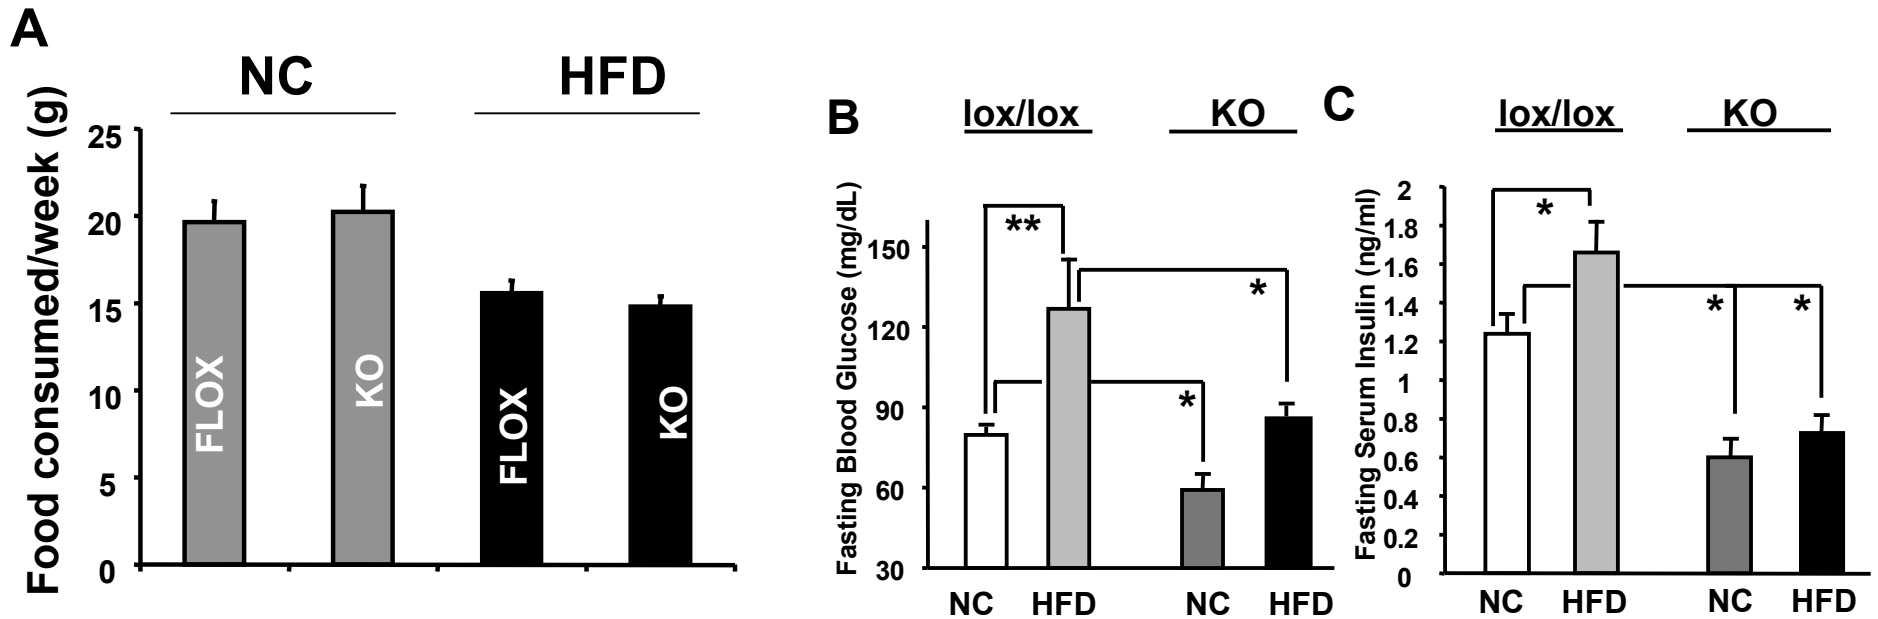

**Supplemental Figure 1.** (A) The average weekly food intake of either normal chow (NC) or high-fat diet (HFD) over a week, expressed in grams. Genotypes of animals are indicated directly on the bars. (B) Fasting blood glucose and (C) fasting serum insulin in lox/lox or KO after an eight-week treatment with either normal chow or high-fat diet.
