# Supplementary material
Source: PubMed Central journal article supplement (PMC1899914)

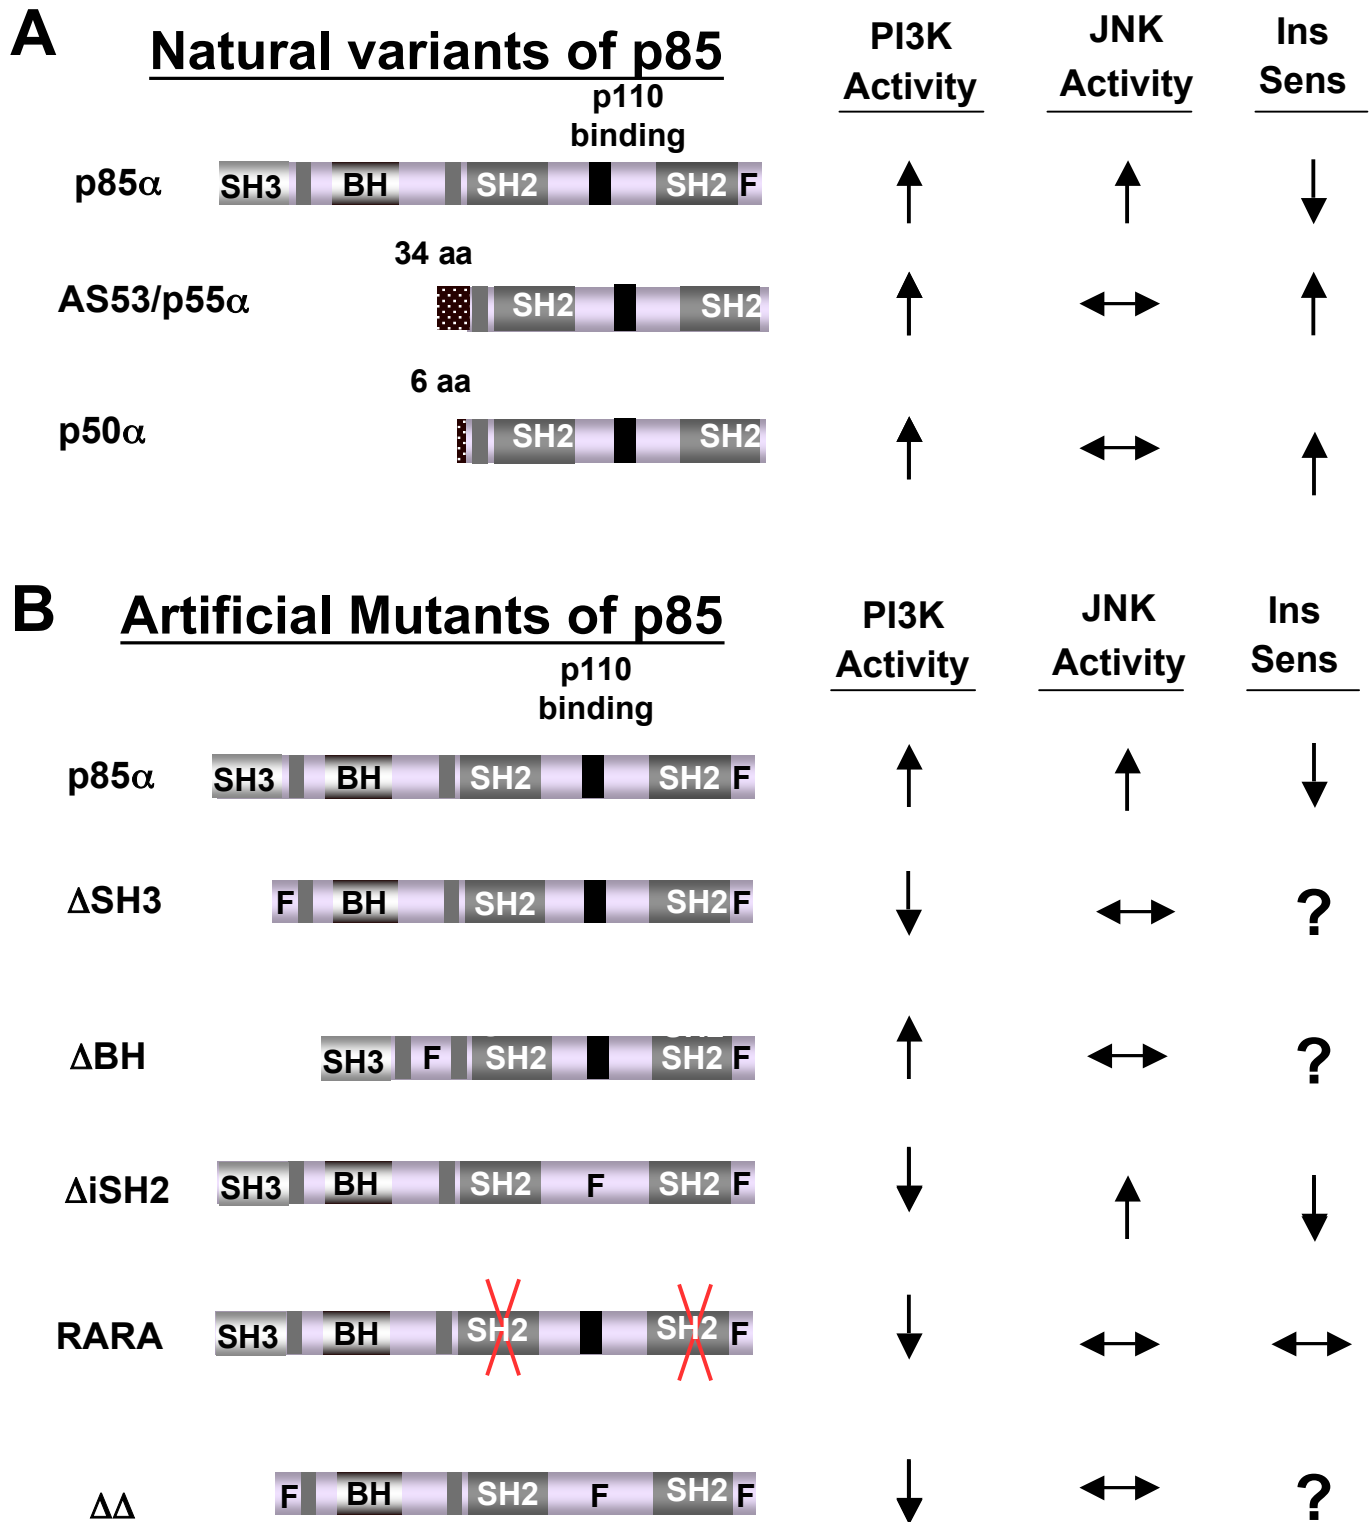

Supplemental Figure 2

Supplement: molcellb_27_8_2830__2.pdf [file molcellb_27_8_2830__2.pdf]
